# Supplementary material for: 3D hierarchical ZnOHF nanostructures: synthesis, characterization and photocatalytic properties
Source: Royal Society of Chemistry journal article supplement (doi:10.1039/c4ce01728e), 2014-01-01

## **Supporting Information**

### **3D hierarchical ZnOHF nanostructures: synthesis, characterization and photocatalytic properties**

Miao Wang\*, Tongming Sun, Yujun Shi, Guoqing Jiang and Yanfeng Tang\*

**Fig. S1.** SEM and TEM images of the ZnOHF synthesized from different fluoride sources.  $K_2SiF_6$  (a-b) nanoflowers and  $NH_4BF_4$  (c-d) nanotubes-assembled microfans

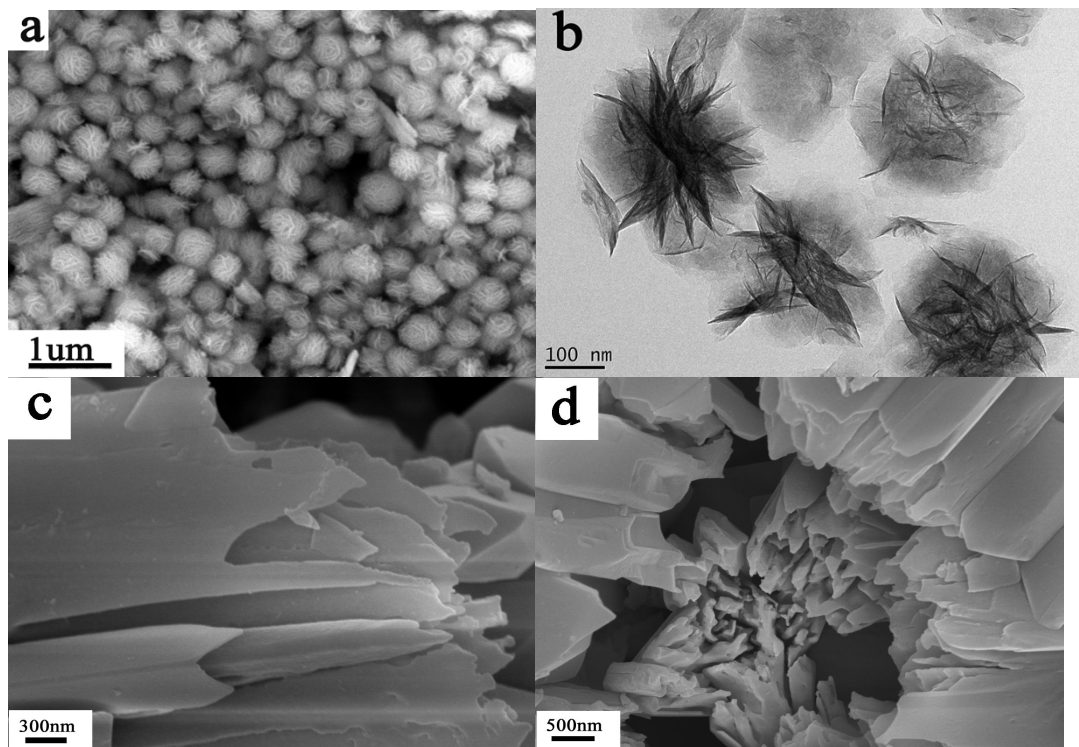

**Fig. S2.** Cyclability of photocatalytic activity of hierarchical ZnOHF nanoflowers under UV light irradiation.

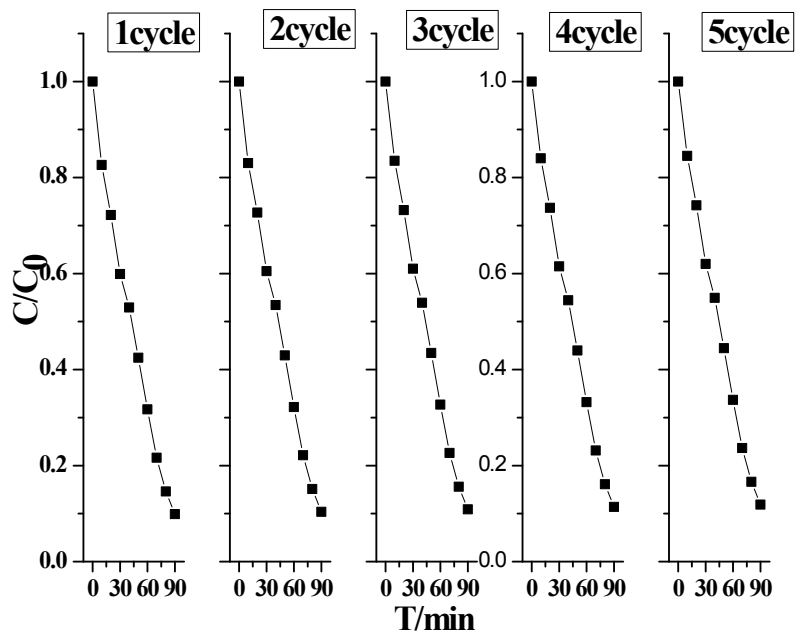

Supplement: c4ce01728e1.pdf [file c4ce01728e1.pdf]
